# Supplementary material
Source: PubMed Central journal article supplement (PMC6885627)
Supplement: supp_RA119.010222_154346_2_supp_396725_pxzlcy.pdf [file supp_RA119.010222_154346_2_supp_396725_pxzlcy.pdf]

# **A Conserved Bcd1 Interaction that Is Essential for Box C/D snoRNP Biogenesis**

Sohail Khoshnevis<sup>1,3</sup>, R. Elizabeth Dreggors<sup>2,3</sup>, Tobias F.R. Hoffmann<sup>1,4</sup> & Homa Ghalei<sup>2,3\*</sup>

<sup>1</sup>Department of Biology, Emory University, Atlanta, Georgia 30322, USA. <sup>2</sup>Graduate Program in Biochemistry, Cell and Developmental Biology (BCDB), Emory University, Atlanta, Georgia 30322, USA. <sup>3</sup>Department of Biochemistry, Emory University School of Medicine, Atlanta, Georgia 30322, USA. <sup>4</sup>present address: Department of Biology, Spelman College, Atlanta, Georgia 30314, USA.

\*To whom correspondence should be addressed: [hghalei@emory.edu](mailto:hghalei@emory.edu)

## **Supporting Information**

**Included Supporting Information: Supplementary Figure S1-3 and Tables S1-S3.**

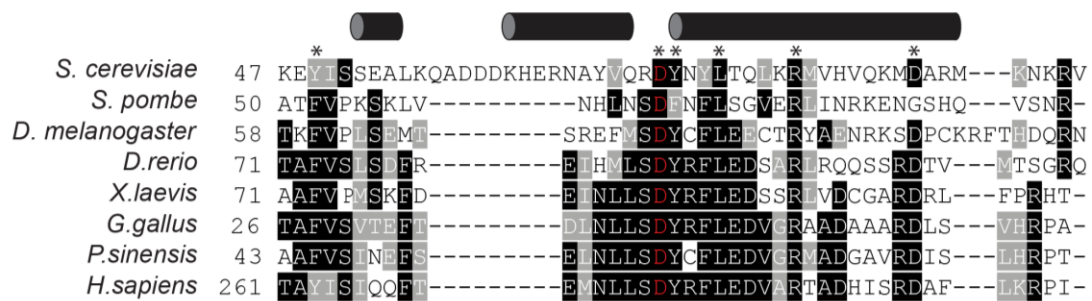

**Figure S1. Sequence alignment of the fragments of Bcd1 corresponding to *S.cerevisiae* residues 47-97 from different organisms.** Very conserved and less conserved residues are outlined in black and grey, respectively. The residues which were mutated in Figure 1D are marked with asterisks. The conserved Asp72 is colored in red. The secondary structure prediction of *S. cerevisiae* Bcd1 is shown on the top, with cylinders depicting alpha helices. This figure is related to Figure 1.

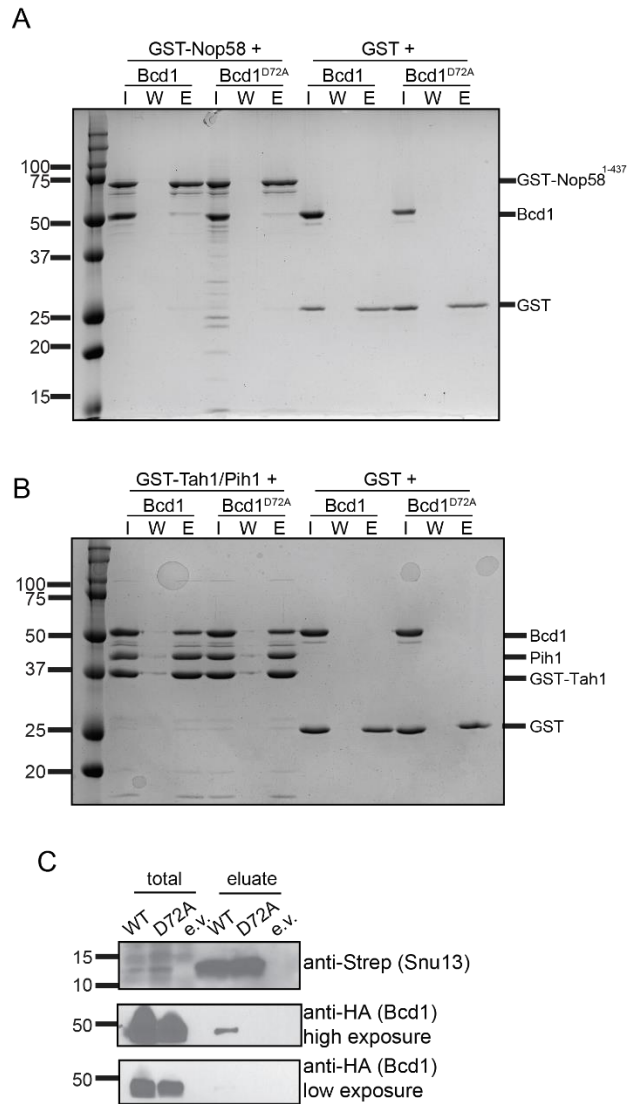

**Figure S2.** (A) Bcd1 and Bcd1-D72A variant bind to GST-Nop58<sup>1-437</sup> but not to GST alone. (B) Bcd1 and Bcd1-D72A bind to GST-Tah1/Pih1 but not to GST alone. (C) Strep-tagged Snu13 can pull down Bcd1 but not Bcd1-D72A variant from total yeast lysate. This figure is related to Figures 2 and 3.

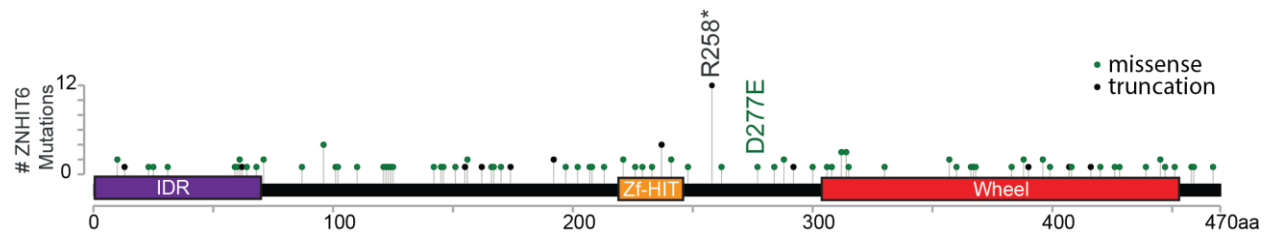

**Figure S3. Analyses of ZNHIT6 cancer mutations.** A stop mutation in ZNHIT6 which may result in ZNHIT6 protein lacking the conserved D277 and the wheel domain is associated with cancer.

**Table S1:** Yeast strains used in this work

| <b>Strain name</b> | <b>Description</b> | <b>Background</b>           | <b>Reference</b> |
|--------------------|--------------------|-----------------------------|------------------|
| yHG000             | WT                 | BY4741                      | GE Dharmacon     |
| yHG057             | <i>tetO7:BCD1</i>  | R1158 (derived from BY4741) | GE Dharmacon     |
| yHG458             | <i>bcd1-D72A</i>   | BY4741                      | This work        |

**Table S2:** Oligonucleotides used in this work

| Use                       | Type      | Gene        | Sequence (5' to 3')                                    |
|---------------------------|-----------|-------------|--------------------------------------------------------|
| Northern probes           |           | U3          | CATAGGATGGGTCAAGATCATCGCGCC                            |
|                           |           | U14         | CGATGGGTTCGTA CTCTACCGTGG                              |
|                           |           | U24         | GGTATGTCTCATT CGGAACTCAAAGTTCCATC<br>TGAAGTAGC         |
|                           |           | snR8        | CACTCGCGCAGCTACCGATCTGGGCCAATGG<br>GAGAC               |
|                           |           | snR35       | GAACAAAATGATGATCTCTCCGATGGACTTGA<br>CGC                |
|                           |           | snR38       | GAGAGGTTACCTATTATTACCCATTCAGACAG<br>GGATAACTG          |
|                           |           | snR46       | CTTCCCTTTGGAAATCGGAAATTC AATGATAT<br>GCCCTATGCCC       |
|                           |           | snR48       | GGAGAGTACTTAACTTCACATCCTAACATTA<br>GAGATGCCAG          |
|                           |           | snR51       | TGTAGTCATCAATTAGCCCC                                   |
|                           |           | scR1        | ATCCCGGCCGCCTCCATCAC                                   |
|                           |           | 18S         | CATGGCTTAATCTTTGAGAC                                   |
|                           |           | 25S         | GCCCGTTCCCTTGGCTGTG                                    |
|                           |           | 003 (A2-A3) | TGTTACCTCTGGGCCC                                       |
|                           |           | B (D-A2)    | GCTCTCATGCTCTTGCC                                      |
|                           |           | E (E-C2)    | GGCCAGCAATTTCAAGTTA                                    |
| Site-directed mutagenesis | Y49A      | <i>BCD1</i> | CAAACACATGATCCTAAGGAGGCTATATCGAG<br>TGAGGCG            |
|                           | D72A      | <i>BCD1</i> | GCTTATGTCCAGAGGGCCTACA ACTATCTGAC<br>GC                |
|                           | Y73A      | <i>BCD1</i> | GCTTATGTCCAGAGGGACGCCA ACTATCTGA<br>CGCAG              |
|                           | D72A,Y73A | <i>BCD1</i> | CGAAATGCTTATGTCCAGAGGGCCGCCA ACT<br>ATCTGACGCAGTTGAAGC |
|                           | L76A      | <i>BCD1</i> | CCAGAGGGACTACA ACTATGCGACGCAGTTG<br>AAGCGAATG          |
|                           | R81A      | <i>BCD1</i> | CTATCTGACGCAGTTGAAGGCAATGGTGCAT<br>GTACAAAAG           |
|                           | D89A      | <i>BCD1</i> | GGTGCATGTACAAAAGATGGCTGCTAGAATGA<br>AGAACAAG           |
| Cloning                   | For       | <i>BCD1</i> | CGATCCCCGGGATGGCGGTGTTGTGTGGTGT<br>ATGC                |
|                           | Rev       | <i>BCD1</i> | CGATCCTCGAGTCATGCAGTGAGGAAATCCAT<br>GGATAAGC           |
|                           | For       | <i>TAH1</i> | CGTCAGGATCCATGAGCCAATTTGAAAAGCAG<br>AAGG               |
|                           | Rev       | <i>TAH1</i> | CGTCACTCGAGTCAGGACCGGTCGTATCCCT<br>CCGG                |
|                           | For       | <i>PIH1</i> | CGATCGGCGCCATGGCCGATTTCTTATTGAGA<br>CC                 |
|                           | Rev       | <i>PIH1</i> | CGTCACTCGAGTTATATATATATATATAGTGTG<br>CGTTCTTTGC        |
|                           | For       | <i>RSA1</i> | CGATAGGCGCCATGAATTATAATAACTTTGAA<br>AATTCGAAGGG        |
|                           | Rev       | <i>RSA1</i> | CGATACTCGAGTTACTTATTTCTAGTAAAGTTG<br>GCTCTACTC         |

|                   |                                        |                   |                                                                  |
|-------------------|----------------------------------------|-------------------|------------------------------------------------------------------|
|                   | For                                    | <i>SNU13</i>      | CGTCAGGATCCATGTCTGCCCAAACCCAAA<br>GGCTTTC                        |
|                   | Rev                                    | <i>SNU13</i>      | CGTCACTCGAGTTAAATTAATAAAGTTTCAATC<br>TTGTCC                      |
|                   | For                                    | <i>HIT1</i>       | CGATAGGATCCATGGTATCTAGTGCAGTTAAA<br>TGTGGC                       |
|                   | Rev                                    | <i>HIT1</i>       | CGATACTCGAGTTATTTCTTCACCGCATTTAAT<br>TTATC                       |
|                   | For                                    | <i>NOP58</i>      | GATCGGATCCATGGCTTACGTTTTAACTGAAA<br>CTTCAGCT                     |
|                   | Rev                                    | <i>NOP58_A437</i> | TCACTCGAGTTAAGCAGCCTTTGCGGTATCAG<br>CAT                          |
| CRISPR<br>primers | Bcd1-D72A repair                       |                   | CGAACGAAATGCTTATGTCCAGAGGGCCTAC<br>AACTATCTAACGCAGTTGAAGCGAATGGT |
|                   | Bcd1 sgRNA mutagenesis                 |                   | CGGGTGGCGAATGGGACTTTTCTGACGCAGT<br>TGAAGCGAAGTTTTAGAGCTAGAAATAGC |
|                   | Bcd1-D72A repair amplification-<br>Rev |                   | CCGCTTGTTCTTCATTCTAGCATCCATCTTTTG<br>TACATGCACCATTCGCT           |
|                   | Bcd1-D72A repair amplification-<br>For |                   | TATCGAGTGAGGCGTTGAAACAGGCGGACGA<br>CGACAAGCACGAACGAAAT           |
| Truncations       | Start 47                               | <i>BCD1</i>       | GACTACCCGGGATGAAGGAGTATATATCGAG<br>TGAGGC                        |
|                   | Start 97                               | <i>BCD1</i>       | CGATCCCGGGATGGTTCTGGGGCCTGTGGGC<br>GGC                           |

**Table S3:** Plasmids used in this work

| <b>Plasmid</b> | <b>Description</b>           | <b>Backbone</b> | <b>Reference</b>  |
|----------------|------------------------------|-----------------|-------------------|
| pHG19          | MBP-Bcd1                     | pSV272          | This work         |
| pHG103         | MBP-Rsa1                     | pSV272          | This work         |
| pHG119         | His-Bcd1                     | pET23a-TEV      | This work         |
| pHG151         | His-Bcd1-D72A                | pET23a-TEV      | This work         |
| pHG104         | Tah1                         | pET24           | This work         |
| pHG107         | Pih1                         | pET23a-TEV      | This work         |
| pHG108         | Snu13                        | pGEX-6P-2       | This work         |
| pHG120         | Tah1                         | pGEX-6P-2       | This work         |
| pHG122         | Pih1                         | pSV272          | This work         |
| pHG138         | Nop58 <sup>1-437</sup>       | pGEX-6P-2       | This work         |
| pHG115         | Hit1                         | pGEX-6P-2       | This work         |
|                | Rvb1/Rvb2                    | pET28           | Zhou et al., 2017 |
| pHG309         | <i>TEF::BCD1</i>             | pRS413          | This work         |
| pHG385         | <i>TEF::bcd1-D72A</i>        | pRS413          | This work         |
| pHG3004        | <i>TEF::bcd1-Y73A</i>        | pRS413          | This work         |
| pHG373         | <i>TEF::bcd1-D72A, Y73A</i>  | pRS413          | This work         |
| pHG379         | <i>TEF::HA-BCD1</i>          | pRS413          | This work         |
| pHG3002        | <i>TEF::HA-bcd1-D72A</i>     | pRS413          | This work         |
| pHG3031        | <i>TEF::ZNHIT6</i>           | pRS413          | This work         |
| pHG3015        | <i>TEF::znhit6-D277A</i>     | pRS413          | This work         |
| pHG3170        | <i>TEF::bcd1-Y49A</i>        | pRS413          | This work         |
| pHG3171        | <i>TEF::bcd1-L76A</i>        | pRS413          | This work         |
| pHG3172        | <i>TEF::bcd1-R81A</i>        | pRS413          | This work         |
| pHG3173        | <i>TEF::bcd1-D89A</i>        | pRS413          | This work         |
| pHG3040        | <i>TEF::Twin-Strep-BCD1</i>  | pRS413          | This work         |
| pHG3073        | <i>TEF::Twin-Strep-D72A</i>  | pRS413          | This work         |
| pHG3193        | <i>GPD::Twin-Strep-Snu13</i> | pRS425          | This work         |
| Addgene #60847 | pCas                         | 2-micron/pUC    | Ryan et al., 2014 |
| pHG3168        | pCas-Bcd1                    | 2-micron/pUC    | This work         |
